# Supplementary material for: Human single chain-transbodies that bound to domain-I of non-structural protein 5A (NS5A) of hepatitis C virus
Source: PubMed Central journal article supplement (PMC5678119; doi:10.1038/s41598-017-14886-9), 2017-11-08
Supplement: 41598_2017_14886_MOESM1_ESM.pdf [file 41598_2017_14886_MOESM1_ESM.pdf]

# Human single chain-transbodies that bound to domain-I of non-structural protein 5A (NS5A) of hepatitis C virus

Kittirat Glab-ampai, Monrat Chulanetra, Aijaz Ahmad Malik, Thanate Juntadech, Jeeraphong

Thanongsaksrikul, Potjane Srimanote, Kanyarat Thueng-in, Nitat Sookrung, Pongsri

Tongtawe & Wanpen Chaicumpa

**Supplementary Table 1.** PCR primers used for amplification of DNA sequences coding for NS5A domains I, II, and III

| Primer name | Sequence                             | Size of amplicon (bp) |
|-------------|--------------------------------------|-----------------------|
| D1 forward  | 5'-GAATTCCTCCCCTTCATCTCTTGTCAAAGG-3' | 555                   |
| D1 reverse  | 5'-GTCGACTTAAGTCTCCGCCGTGATGTGGGG-3' |                       |
| D2 forward  | 5'-GAATTCTATGACGTGGACATGGTCGATGCC-3' | 280                   |
| D2 reverse  | 5'-GTCGACTTAACAACCAGCAACGGTGGGCGG-3' |                       |
| D3 forward  | 5'-GAATTCAGGAGACGCCGGACAGTGGGT-3'    | 360                   |
| D3 reverse  | 5'-GTCGACTTAGCAGCACACGGTGGTATCGTC-3' |                       |

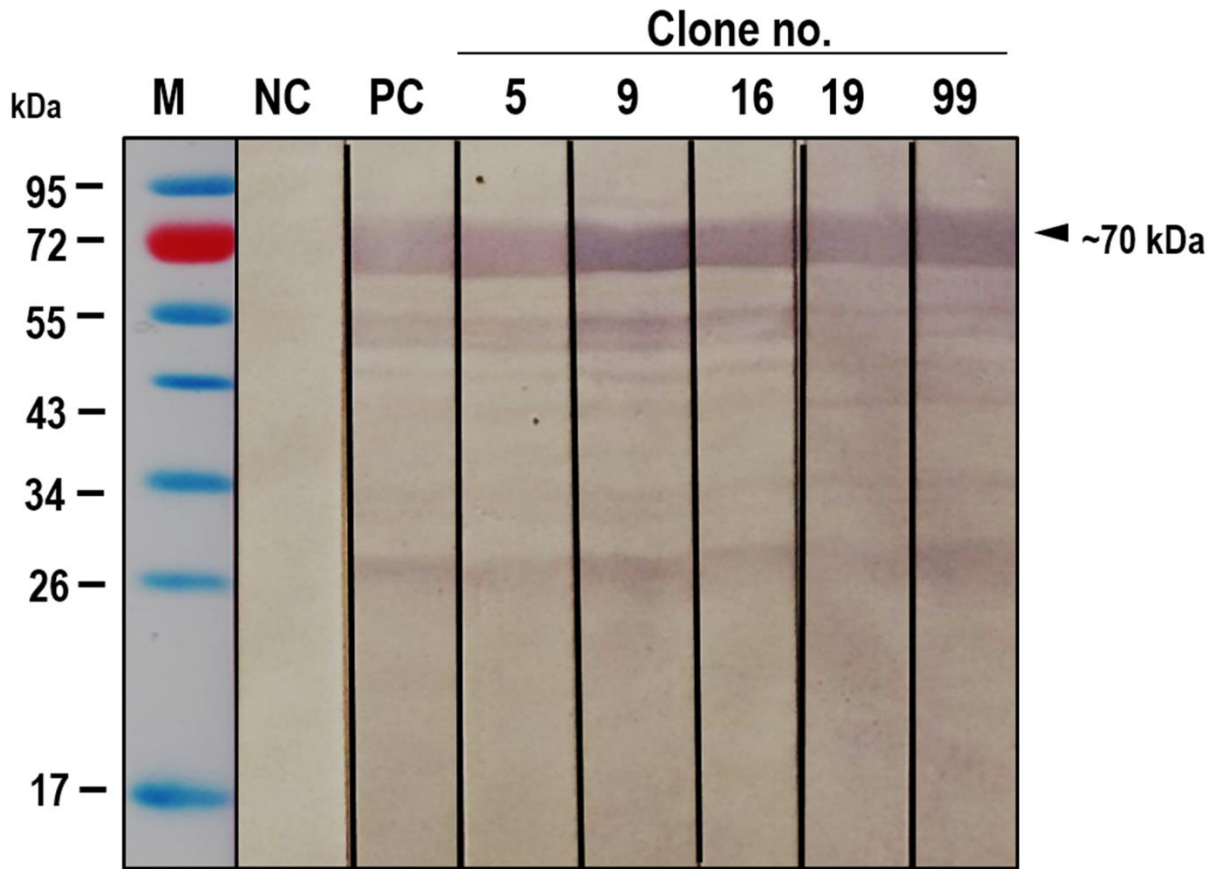

**Supplementary Figure S1.** Unprocessed immunoblots that relate to Figure 2.

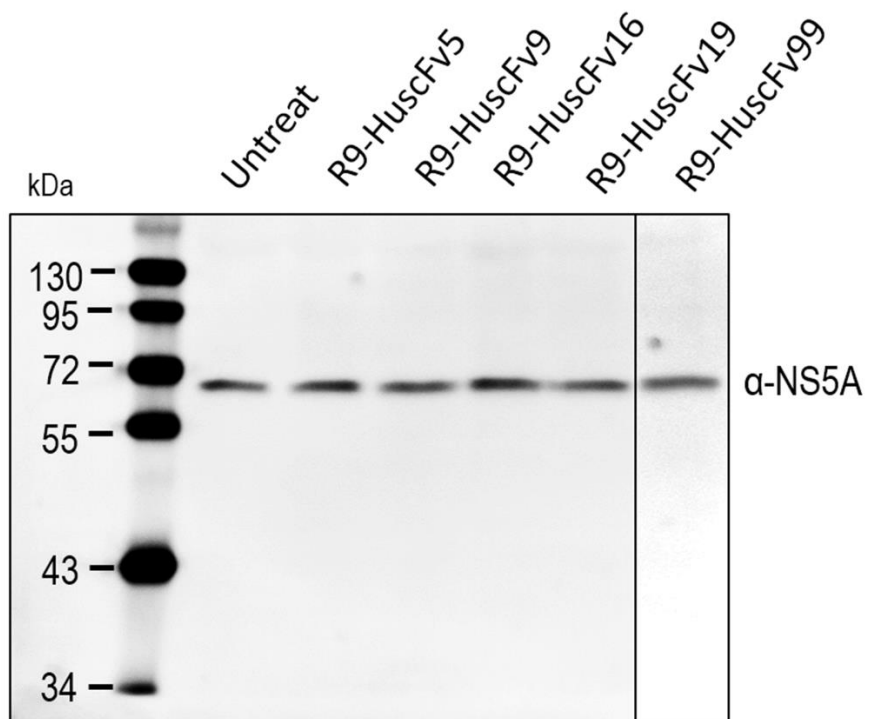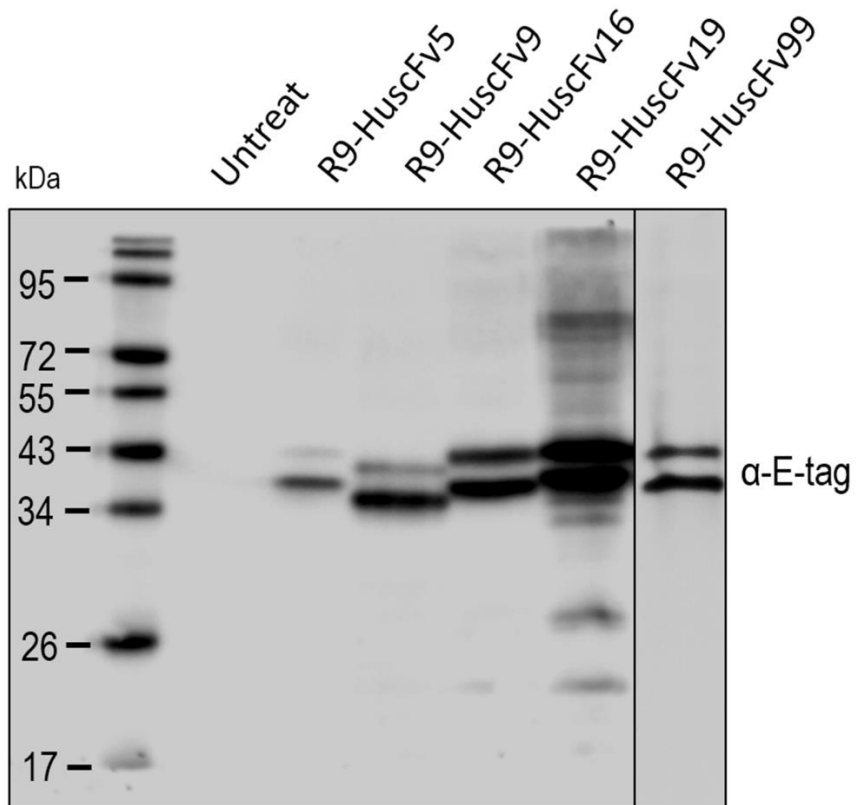

**Supplementary Figure S2.** Unprocessed immunoblots that relate to Figure 5.

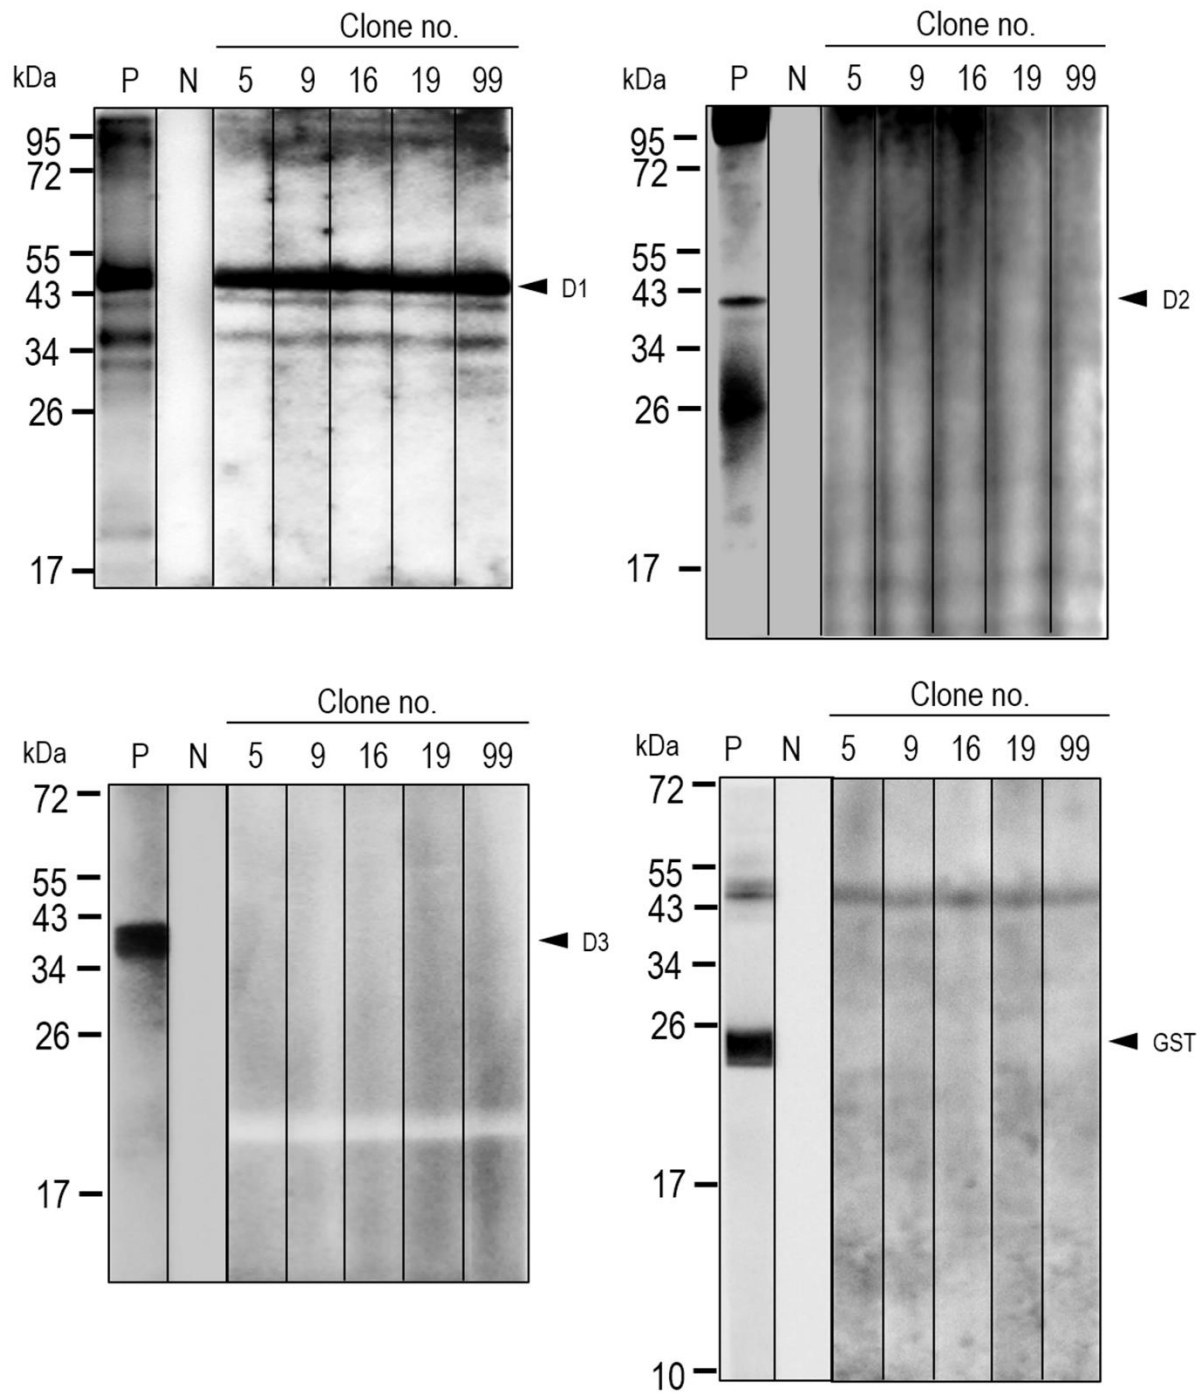

**Supplementary Figure S3.** Unprocessed immunoblots that relate to Figure 10.
